# Supplementary material
Source: PubMed Central journal article supplement (PMC6056851)
Supplement: IAI.00769-17_zii999092491s1.pdf [file IAI.00769-17_zii999092491s1.pdf]

## Supplementary Figure Legends

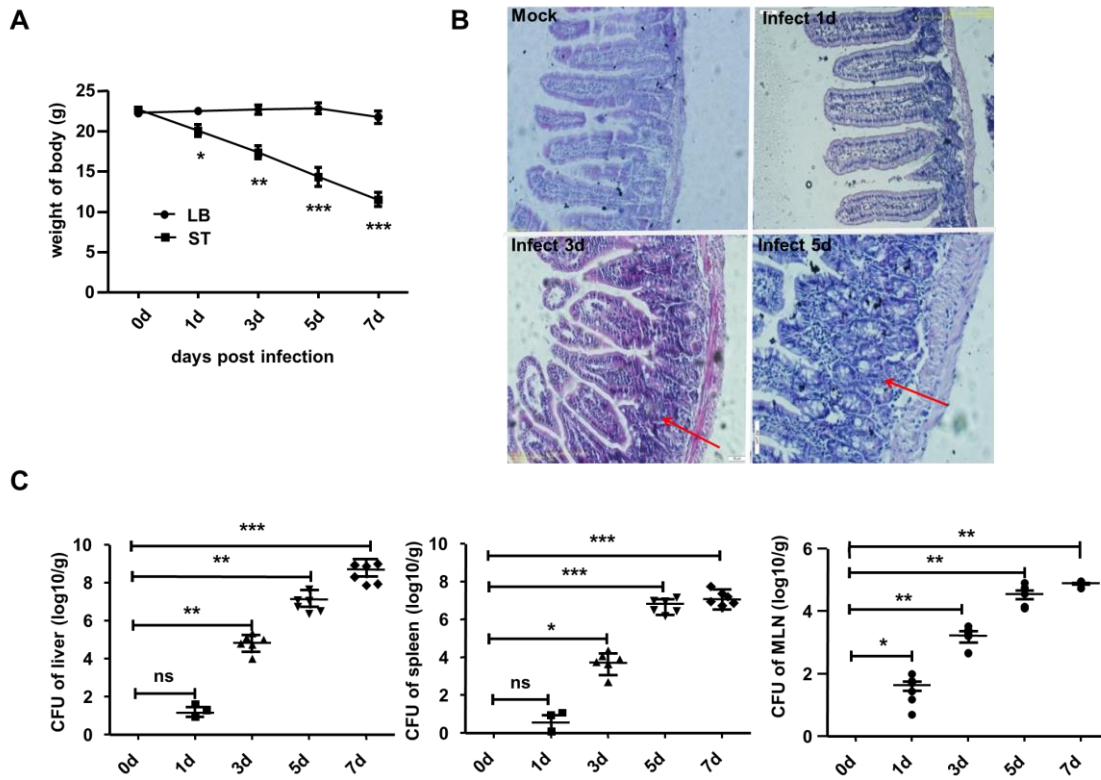

Figure S1

**Supplementary Fig 1.** Oral *S. typhimurium* infection induces mouse enteritis and system infection. C57BL/6 mice were infected orally with *S. typhimurium* ( $1 \times 10^5$ ) or mock-infected with Luria-Bertani (LB). Weight loss was evaluated at various time points post-infection (n = 5) (A). Hematoxylin and eosin (H&E)-stained sections of small intestines from infected mice (B). Bacterial loads of the liver, spleen, and MLN were determined by LB plate assay (n = 6) (C). \*p < 0.05, \*\*p < 0.01, \*\*\*p < 0.001, compared with the group on day 0.

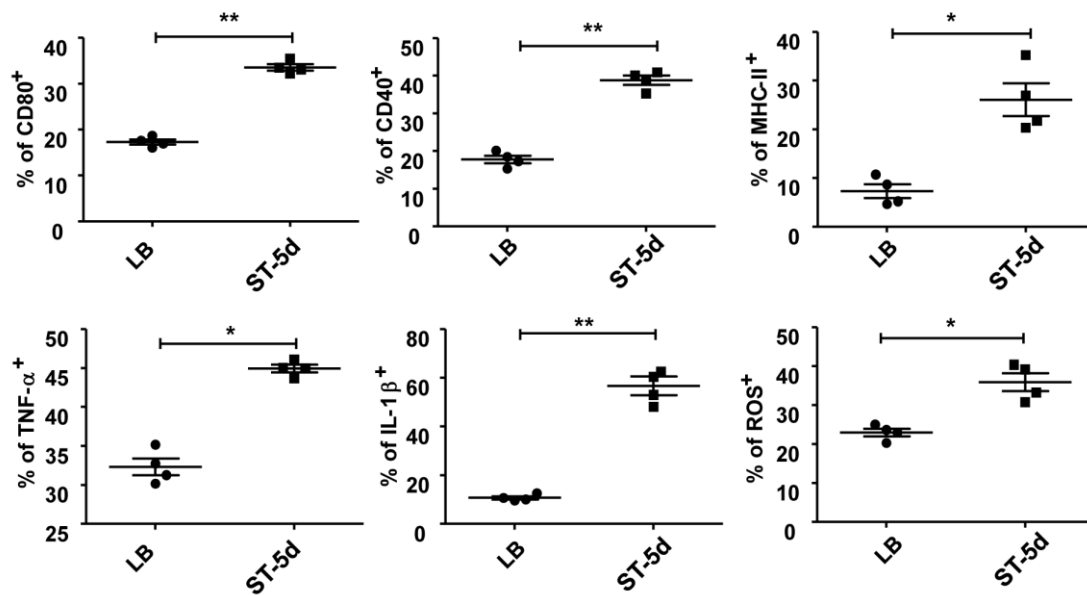

Figure S2

**Supplementary Fig 2.** Phenotype and activation of macrophage in the Lamina propria of *S. typhimurium*-infected mice. The expression of CD80, CD40, MHC-II and ROS, as well as intracellular TNF- $\alpha$  and IL-1 $\beta$  on/in F4/80<sup>+</sup>CD11b<sup>+</sup> macrophages was detected by FACS and statistically analyzed. Data are representative of three independent experiments (means $\pm$ SD). \*p<0.05, \*\*p<0.01, \*\*\*p<0.001, compared with the LB group.

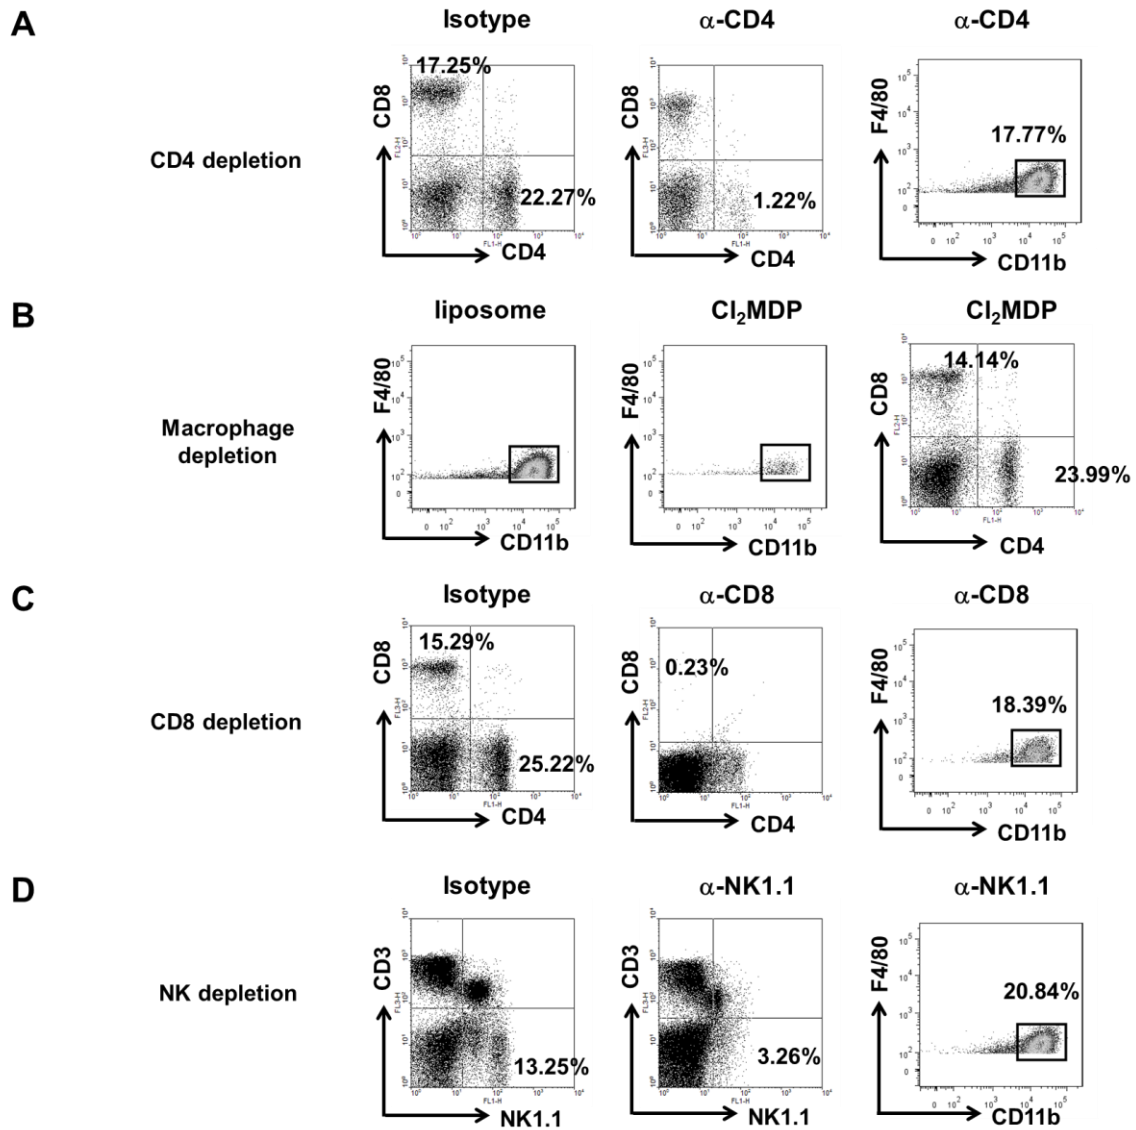

**Figure S3**

**Supplementary Fig 3.** The *in vivo* depletion efficiency of CD4<sup>+</sup>T, CD8<sup>+</sup>T, macrophages, and NK cells. Depleting antibodies ( $\alpha$ -CD4,  $\alpha$ -CD8,  $\alpha$ -NK1.1) and  $Cl_2$ MDP-liposome were injected *i.p.* into C57BL/6 mice. Three days later, the removal efficiency was detected by FACS.

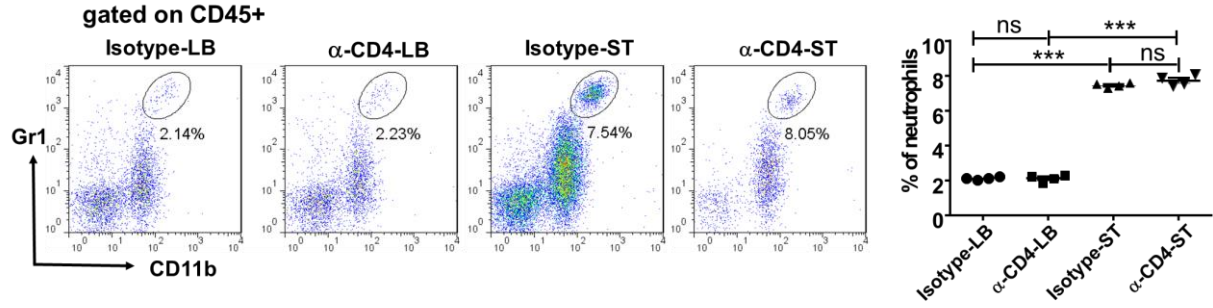

Fig. S4

**Supplementary Fig 4.** CD4<sup>+</sup>T cells depletion has no effect on the proportion of intestinal lamina propria neutrophils during *S. typhimurium* infection. α-CD4 antibody were injected *i.p.* into C57BL/6 mice. Three days later, mice were orally infected with *S. typhimurium*. Five days later, the percentage of intestinal neutrophils were detected by FACS. The LP leukocytes were first gated (FSC-H vs. FSC-H) and further stained with 7-AAD to exclude dead cells, leukocytes were then selected by the expression of CD45. The percentage of Gr1<sup>+</sup>CD11b<sup>+</sup>neutrophils were determined by flow cytometry. Data are representative of three independent experiments (means ± SD). \*\*\*p < 0.001, compared with the control group.

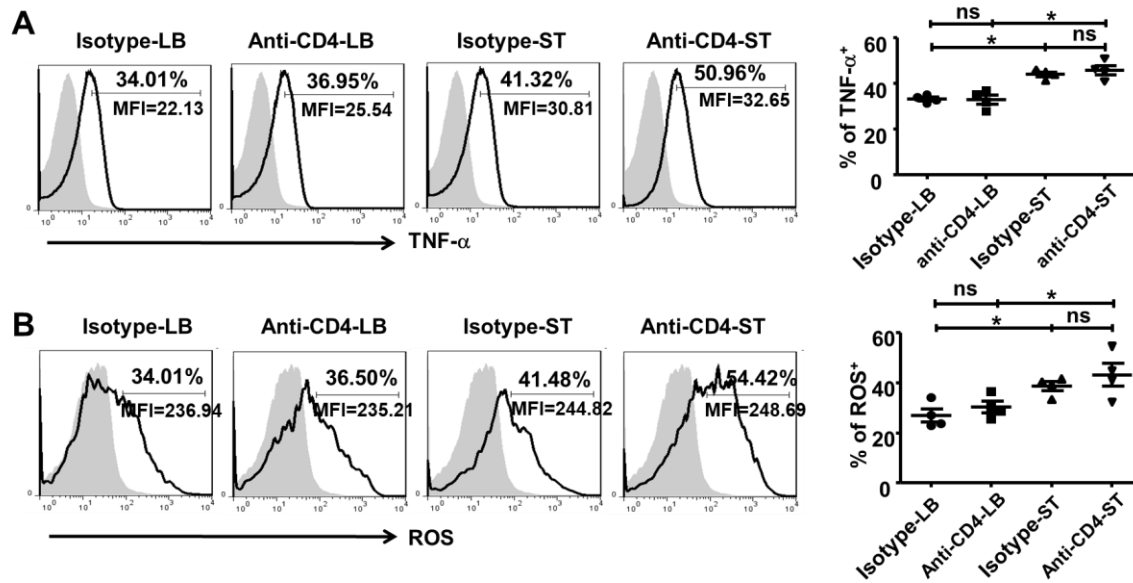

Figure S5

**Supplementary Fig 5.** Depletion of CD4<sup>+</sup>T cells did not impair the production of TNF- $\alpha$  and ROS by intestinal macrophages during *S. typhimurium* infection. Mice were injected *i.p.* with anti-CD4 antibodies. Three days later, the treated mice were orally infected with *S. typhimurium*. Five days after infection, the small intestinal LP lymphocytes were isolated and the production of TNF- $\alpha$  (A) and ROS (B) by F4/80+CD11c<sup>+</sup> macrophages was detected by flow cytometry. Data are expressed as the means  $\pm$  SD of at least three independent experiments. \* $p < 0.05$ .

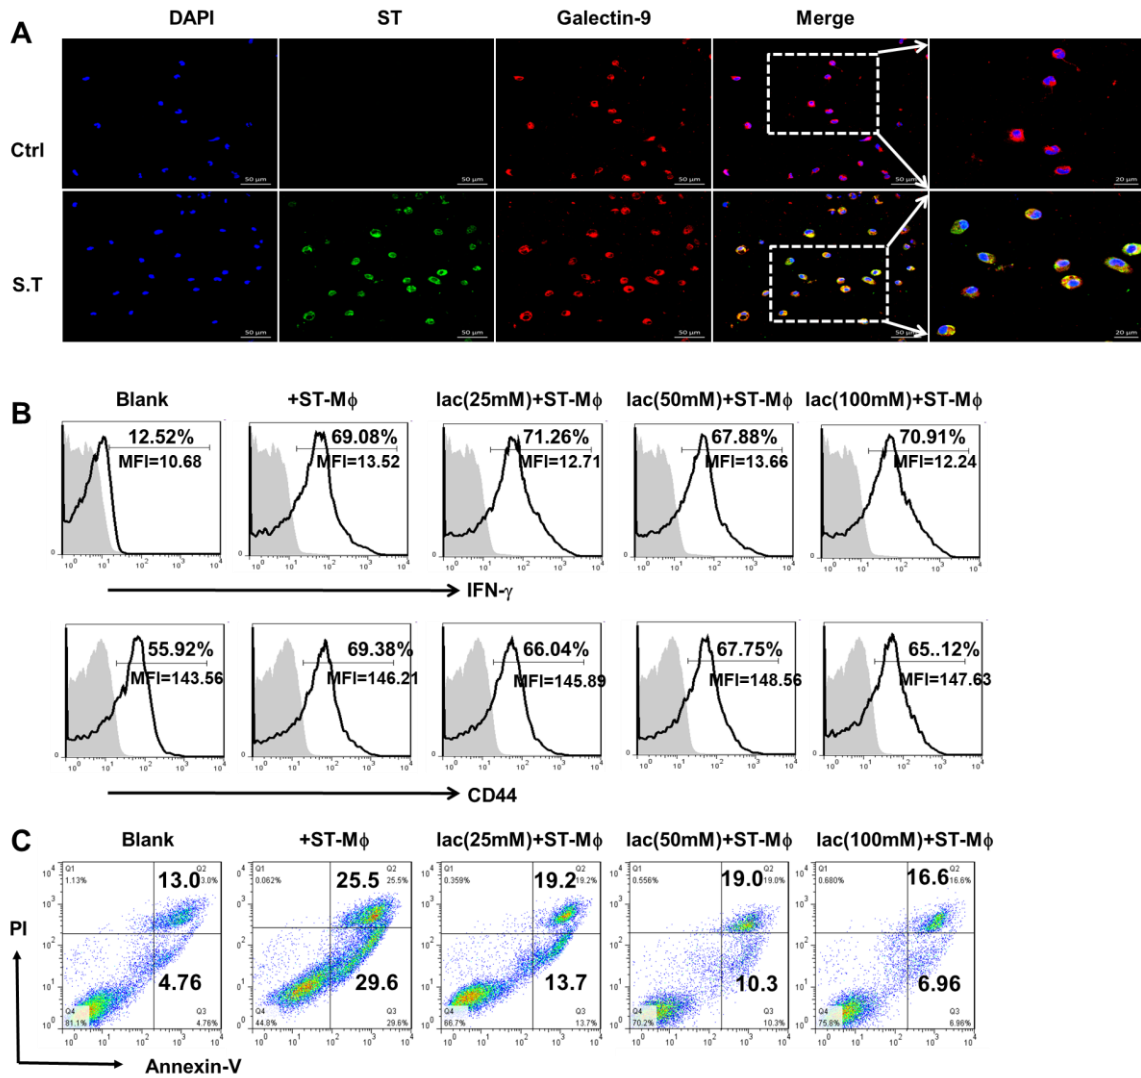

**Figure S6**

**Supplementary Fig 6.** Tim-3–galectin-9 pathway is involved in the induction of CD4<sup>+</sup>T cell apoptosis. LP macrophages were infected with *S. typhimurium* (MOI=10:1). One hour later, the expression of galectin-9 on macrophages was determined by immunofluorescence staining. Green and red colors represent *S. typhimurium* and galectin-9, respectively; blue represents nuclei. (A). CD4<sup>+</sup>T cells isolated from LP lymphocytes by MACS were co-cultured with *S. typhimurium*-infected macrophages. The production of IFN- $\gamma$  and expression of CD44 by CD4<sup>+</sup>T cells were measured by FACS (B). The apoptosis of CD4<sup>+</sup>T cells were measured by Annexin-V/PI double staining methods (C). Data are representative of three independent experiments.

**Supplementary Table 1. Antibodies used for flow cytometry.**

| <b>Antibody</b> | <b>Company</b> | <b>Clone</b> |
|-----------------|----------------|--------------|
| NK1.1           | BD Biosciences | PK136        |
| CD4             | eBioscience    | GK1.5        |
| CD8             | Biologend      | 53-5.8       |
| CD11c           | Biologend      | N418         |
| CD40            | eBioscience    | HM40.3       |
| CD80            | eBioscience    | 16-10A1      |
| CD69            | eBioscience    | H1.2F3       |
| CD44            | eBioscience    | IM7          |
| IFN- $\gamma$   | eBioscience    | XMG1.2       |
| IL-1 $\beta$    | R&D Systems    | 166931       |
| CD11b           | Biologend      | M1/70        |
| F4/80           | eBioscience    | BM8          |
| Tim-3           | eBioscience    | RMT3-23      |
| MHC II          | Biologend      | M5/114.15.2  |
| CD3e            | Biologend      | 145-2c11     |
| galectin-9      | eBioscience    | RG9-35       |
| Ly-6C           | ebioscience    | HK1.4        |
| CD45            | BD Biosciences | 30-F11       |
| Siglec-F        | BD Biosciences | E50-2440     |
| Ly-6G           | Biologend      | 1A8          |
| Gr1             | Biologend      | RB6-8C5      |
